# Supplementary material
Source: ML conference proceedings conference paper supplement (https://proceedings.neurips.cc/paper_files/paper/2019/hash/bb04af0f7ecaee4aae62035497da1387-Abstract.html)
Supplement: Supplementary file [file bb04af0f7ecaee4aae62035497da1387-Supplemental.zip]

---

# Provably Powerful Graph Networks: Supplementary Material

---

Haggai Maron\* Heli Ben-Hamu\* Hadar Serviansky\* Yaron Lipman  
Weizmann Institute of Science  
Rehovot, Israel

## 1 Proof of Proposition 1

*Proof.* First, if  $\mathbf{X}' = g \cdot \mathbf{X}$ , then  $p_\alpha(\mathbf{X}) = p_\alpha(\mathbf{X}')$  for all  $\alpha$  and therefore  $u(\mathbf{X}) = u(\mathbf{X}')$ . In the other direction assume by way of contradiction that  $u(\mathbf{X}) = u(\mathbf{X}')$  and  $g \cdot \mathbf{X} \neq \mathbf{X}'$ , for all  $g \in S_n$ . That is,  $\mathbf{X}$  and  $\mathbf{X}'$  represent different multisets. Let  $[\mathbf{X}] = \{g \cdot \mathbf{X} \mid g \in S_n\}$  denote the orbit of  $\mathbf{X}$  under the action of  $S_n$ ; similarly denote  $[\mathbf{X}']$ . Let  $K \subset \mathbb{R}^{n \times a}$  be a compact set containing  $[\mathbf{X}]$ ,  $[\mathbf{X}']$ , where  $[\mathbf{X}] \cap [\mathbf{X}'] = \emptyset$  by assumption.

By the Stone–Weierstrass Theorem applied to the algebra of continuous functions  $C(K, \mathbb{R})$  there exists a polynomial  $f$  so that  $f|_{[\mathbf{X}]} \geq 1$  and  $f|_{[\mathbf{X}']} \leq 0$ . Consider the polynomial

$$q(\mathbf{X}) = \frac{1}{n!} \sum_{g \in S_n} f(g \cdot \mathbf{X}).$$

By construction  $q(g \cdot \mathbf{X}) = q(\mathbf{X})$ , for all  $g \in S_n$ . Therefore  $q$  is a multi-symmetric polynomial. Therefore,  $q(\mathbf{X}) = r(u(\mathbf{X}))$  for some polynomial  $r$ . On the other hand,

$$1 \leq q(\mathbf{X}) = r(u(\mathbf{X})) = r(u(\mathbf{X}')) = q(\mathbf{X}') \leq 0,$$

where we used the assumption that  $u(\mathbf{X}) = u(\mathbf{X}')$ . We arrive at a contradiction.  $\square$

## 2 Proof of equivariance of WL update step

Consider the formal tensor  $\mathbf{B}^j$  of dimension  $n^k$  with multisets as entries:

$$\mathbf{B}_i^j = \{\mathbf{C}_j^{l-1} \mid j \in N_j(i)\}. \quad (1)$$

Then the  $k$ -WL update step (Equation 3) can be written as

$$\mathbf{C}_i^l = \text{enc} \left( \mathbf{C}_i^{l-1}, \mathbf{B}_i^1, \mathbf{B}_i^2, \dots, \mathbf{B}_i^k \right). \quad (2)$$

To show equivariance, it is enough to show that each entry of the r.h.s. tuple is equivariant. For its first entry:  $(g \cdot \mathbf{C}_i^{l-1})_i = \mathbf{C}_{g^{-1}(i)}^{l-1}$ . For the other entries, consider w.l.o.g.  $\mathbf{B}_i^j$ :

$$\{(g \cdot \mathbf{C}_j^{l-1})_j \mid j \in N_j(i)\} = \{\mathbf{C}_{g^{-1}(j)}^{l-1} \mid j \in N_j(i)\} = \{\mathbf{C}_j^{l-1} \mid j \in N_j(g^{-1}(i))\} = \mathbf{B}_{g^{-1}(i)}^j.$$

We get that feeding  $k$ -WL update rule with  $g \cdot \mathbf{C}^{l-1}$  we get as output  $\mathbf{C}_{g^{-1}(i)}^l = (g \cdot \mathbf{C}^l)_i$ .

---

\*Equal contribution

### 3 Proof of Theorem 1

*Proof.* We will prove a slightly stronger claim: Assume we are given some finite set of graphs. For example, we can think of all combinatorial graphs (i.e., graphs represented by binary adjacency matrices) of  $n$  vertices. Our task is to build a  $k$ -order network  $F$  that assigns different output  $F(G) \neq F(G')$  whenever  $G, G'$  are non-isomorphic graphs distinguishable by the  $k$ -WL test.

Our construction of  $F$  has three main steps. First in Section 3.1 we implement the initialization step. Second, Section 3.2 we implement the coloring update rules of the  $k$ -WL. Lastly, we implement a histogram calculation providing different features to  $k$ -WL distinguishable graphs in the collection.

#### 3.1 Input and Initialization

**Input.** The input to the network can be seen as a tensor of the form  $\mathbf{B} \in \mathbb{R}^{n^2 \times (e+1)}$  encoding an input graph  $G = (V, E, d)$ , as follows. The last channel of  $\mathbf{B}$ , namely  $\mathbf{B}_{:, :, e+1}$  (‘:’ stands for all possible values  $[n]$ ) encodes the adjacency matrix of  $G$  according to  $E$ . The first  $e$  channels  $\mathbf{B}_{:, :, 1:e}$  are zero outside the diagonal, and  $\mathbf{B}_{i, i, 1:e} = d(v_i) \in \mathbb{R}^e$  is the color of vertex  $v_i \in V$ . Our assumption of finite graph collection means the set  $\Omega \subset \mathbb{R}^{n^2 \times (e+1)}$  of possible input tensors  $\mathbf{B}$  is finite as well. Next we describe the different parts of  $k$ -WL implementation with  $k$ -order network. For brevity, we will denote by  $\mathbf{B} \in \mathbb{R}^{n^k \times a}$  the input to each part and by  $\mathbf{C} \in \mathbb{R}^{n^k \times b}$  the output.

**Initialization.** We start with implementing the initialization of  $k$ -WL, namely computing a coloring representing the isomorphism type of each  $k$ -tuple. Our first step is to define a linear equivariant operator that extracts the sub-tensor corresponding to each multi-index  $\mathbf{i}$ : let  $L : \mathbb{R}^{n^2 \times (e+1)} \rightarrow \mathbb{R}^{n^k \times k^2 \times (e+2)}$  be the linear operator defined by

$$\begin{aligned} L(\mathbf{X})_{\mathbf{i}, r, s, w} &= \mathbf{X}_{i_r, i_s, w}, \quad w \in [e+1] \\ L(\mathbf{X})_{\mathbf{i}, r, s, e+2} &= \begin{cases} 1 & i_r = i_s \\ 0 & \text{otherwise} \end{cases} \end{aligned}$$

for  $\mathbf{i} \in [n]^k, r, s \in [k]$ .

$L$  is equivariant with respect to the permutation action. Indeed, for  $w \in [e+1]$ ,

$$(g \cdot L(\mathbf{X}))_{\mathbf{i}, r, s, w} = L(\mathbf{X})_{g^{-1}(\mathbf{i}), r, s, w} = \mathbf{X}_{g^{-1}(i_r), g^{-1}(i_s), w} = (g \cdot \mathbf{X})_{i_r, i_s, w} = L(g \cdot \mathbf{X})_{\mathbf{i}, r, s, w}.$$

For  $w = e+2$  we have

$$(g \cdot L(\mathbf{X}))_{\mathbf{i}, r, s, w} = L(\mathbf{X})_{g^{-1}(\mathbf{i}), r, s, w} = \begin{cases} 1 & g^{-1}(i_r) = g^{-1}(i_s) \\ 0 & \text{otherwise} \end{cases} = \begin{cases} 1 & i_r = i_s \\ 0 & \text{otherwise} \end{cases} = L(g \cdot \mathbf{X})_{\mathbf{i}, r, s, w}.$$

Since  $L$  is linear and equivariant it can be represented as a single linear layer in a  $k$ -order network. Note that  $L(\mathbf{B})_{\mathbf{i}, :, :, 1:(e+1)}$  contains the sub-tensor of  $\mathbf{B}$  defined by the  $k$ -tuple of vertices  $(v_{i_1}, \dots, v_{i_k})$ , and  $L(\mathbf{B})_{\mathbf{i}, :, :, e+2}$  represents the equality pattern of the  $k$ -tuple  $\mathbf{i}$ , which is equivalent to the equality pattern of the  $k$ -tuple of vertices  $(v_{i_1}, \dots, v_{i_k})$ . Hence,  $L(\mathbf{B})_{\mathbf{i}, :, :, :}$  represents the isomorphism type of the  $k$ -tuple of vertices  $(v_{i_1}, \dots, v_{i_k})$ . The first layer of our construction is therefore  $\mathbf{C} = L(\mathbf{B})$ .

#### 3.2 $k$ -WL update step

We next implement Equation 3. We achieve that in 3 steps. As before let  $\mathbf{B} \in \mathbb{R}^{n^k \times a}$  be the input tensor to the the current  $k$ -WL step.

First, apply the polynomial function  $\tau : \mathbb{R}^a \rightarrow \mathbb{R}^b$ ,  $b = \binom{n+a-1}{a-1}$  entrywise to  $\mathbf{B}$ , where  $\tau$  is defined by  $\tau(x) = (x^\alpha)_{|\alpha| \leq n}$  (note that  $b$  is the number of multi-indices  $\alpha$  such that  $|\alpha| \leq n$ ). This gives  $\mathbf{Y} \in \mathbb{R}^{n^k \times b}$  where  $\mathbf{Y}_{\mathbf{i}, :} = \tau(\mathbf{B}_{\mathbf{i}, :}) \in \mathbb{R}^b$ .

Second, apply the linear operator

$$\mathbf{C}_{\mathbf{i}, r}^j := L_j(\mathbf{Y})_{\mathbf{i}, r} = \sum_{i'=1}^n \mathbf{Y}_{i_1, \dots, i_{j-1}, i', i_{j+1}, \dots, i_k, r}, \quad \mathbf{i} \in [n]^k, r \in [b].$$

$L_j$  is equivariant with respect to the permutation action. Indeed,  $L_j(g \cdot \mathbf{Y})_{\mathbf{i},r} =$

$$\sum_{i'=1}^n (g \cdot \mathbf{Y})_{i_1, \dots, i_{j-1}, i', i_{j+1}, \dots, r} = \sum_{i'=1}^n \mathbf{Y}_{g^{-1}(i_1) \dots, g^{-1}(i_{j-1}), i', g^{-1}(i_{j+1}), \dots, r} = L_j(\mathbf{Y})_{g^{-1}(\mathbf{i}), r} = (g \cdot L_j(\mathbf{Y}))_{\mathbf{i}, r}.$$

Now, note that

$$\mathbf{C}_{\mathbf{i},:}^j = L_j(\mathbf{Y})_{\mathbf{i},:} = \sum_{i'=1}^n \tau(\mathbf{B}_{i_1, \dots, i_{j-1}, i', i_{j+1}, \dots, i_k, :}) = \sum_{j \in N_j(\mathbf{i})} \tau(\mathbf{B}_{j,:}) = u(\mathbf{X}),$$

where  $\mathbf{X} = \mathbf{B}_{i_1, \dots, i_{j-1}, :, i_{j+1}, \dots, i_k, :}$  as desired.

Third, the  $k$ -WL update step is the concatenation:  $(\mathbf{B}, \mathbf{C}^1, \dots, \mathbf{C}^k)$ .

To finish this part we need to replace the polynomial function  $\tau$  with an MLP  $m : \mathbb{R}^a \rightarrow \mathbb{R}^b$ . Since there is a finite set of input tensors  $\Omega$ , there could be only a finite set  $\Upsilon$  of colors in  $\mathbb{R}^a$  in the input tensors to every update step. Using MLP universality (Cybenko, 1989; Hornik, 1991), let  $m$  be an MLP so that  $\|\tau(x) - m(x)\| < \epsilon$  for all possible colors  $x \in \Upsilon$ . We choose  $\epsilon$  sufficiently small so that for all possible  $\mathbf{X} = (\mathbf{B}_j \mid j \in N_j(\mathbf{i})) \in \mathbb{R}^{n \times a}$ ,  $\mathbf{i} \in [n]^k$ ,  $j \in [k]$ ,  $v(\mathbf{X}) = \sum_{i \in [n]} m(x_i)$  satisfies the same properties as  $u(\mathbf{X}) = \sum_{i \in [n]} \tau(x_i)$  (see Proposition 1), namely  $v(\mathbf{X}) = v(\mathbf{X}')$  iff  $\exists g \in S_n$  so that  $\mathbf{X}' = g \cdot \mathbf{X}$ . Note that the 'if' direction is always true by the invariance of the sum operator to permutations of the summands. The 'only if' direction is true for sufficiently small  $\epsilon$ . Indeed,  $\|v(\mathbf{X}) - u(\mathbf{X})\| \leq n \max_{i \in [n]} \|m(x_i) - \tau(x_i)\| \leq n\epsilon$ , since  $x_i \in \Upsilon$ . Since this error can be made arbitrary small,  $u$  is injective and there is a finite set of possible  $\mathbf{X}$  then  $v$  can be made injective by sufficiently small  $\epsilon > 0$ .

### 3.3 Histogram computation

So far we have shown we can construct a  $k$ -order equivariant network  $H = L_d \circ \sigma \circ \dots \circ \sigma \circ L_1$  implementing  $d$  steps of the  $k$ -WL algorithm. We take  $d$  sufficiently large to discriminate the graphs in our collection as much as  $k$ -WL is able to. Now, when feeding an input graph this equivariant network outputs  $H(\mathbf{B}) \in \mathbb{R}^{n^k \times a}$  which matches a color  $H(\mathbf{B})_{\mathbf{i},:}$  (i.e., vector in  $\mathbb{R}^a$ ) to each  $k$ -tuple  $\mathbf{i} \in [n]^k$ .

To produce the final network we need to calculate a feature vector per graph that represents the histogram of its  $k$ -tuples' colors  $H(\mathbf{B})$ . As before, since we have a finite set of graphs, the set of colors in  $H(\mathbf{B})$  is finite; let  $b$  denote this number of colors. Let  $m : \mathbb{R}^a \rightarrow \mathbb{R}^b$  be an MLP mapping each color  $x \in \mathbb{R}^a$  to the one-hot vector in  $\mathbb{R}^b$  representing this color. Applying  $m$  entrywise after  $H$ , namely  $m(H(\mathbf{B}))$ , followed by the summing invariant operator  $h : \mathbb{R}^{n^k \times b} \rightarrow \mathbb{R}^b$  defined by  $h(\mathbf{Y})_j = \sum_{i \in [n]^k} \mathbf{Y}_{\mathbf{i},j}$ ,  $j \in [b]$  provides the desired histogram. Our final  $k$ -order invariant network is

$$F = h \circ m \circ L_d \circ \sigma \circ \dots \circ \sigma \circ L_1.$$

□

## 4 Proof of Theorem 2

*Proof.* The second claim is proved in Lemma 1. Next we construct a network as in Equation 6 distinguishing a pair of graphs that are 3-WL distinguishable. As before, we will construct the network distinguishing any finite set of graphs of size  $n$ . That is, we consider a finite set of input tensors  $\Omega \subset \mathbb{R}^{n^2 \times (e+2)}$ .

**Input.** We assume our input tensors have the form  $\mathbf{B} \in \mathbb{R}^{n^2 \times (e+2)}$ . The first  $e+1$  channels are as before, namely encode vertex colors (features) and adjacency information. The  $e+2$  channel is simply taken to be the identity matrix, that is  $\mathbf{B}_{:,e+2} = I_d$ .

**Initialization.** First, we need to implement the 2-FWL initialization (see Section 3.2). Namely, given an input tensor  $\mathbf{B} \in \mathbb{R}^{n^2 \times (e+1)}$  construct a tensor that colors 2-tuples according to their

isomorphism type. In this case the isomorphism type is defined by the colors of the two nodes and whether they are connected or not. Let  $\mathbf{A} := \mathbf{B}_{:, :, e+1}$  denote the adjacency matrix, and  $\mathbf{Y} := \mathbf{B}_{:, :, 1:e}$  the input vertex colors. Construct the tensor  $\mathbf{C} \in \mathbb{R}^{n^2 \times (4e+1)}$  defined by the concatenation of the following colors matrices into one tensor:

$$\mathbf{A} \cdot \mathbf{Y}_{:, :, j}, \quad (\mathbf{1}\mathbf{1}^T - \mathbf{A}) \cdot \mathbf{Y}_{:, :, j}, \quad \mathbf{Y}_{:, :, j} \cdot \mathbf{A}, \quad \mathbf{Y}_{:, :, j} \cdot (\mathbf{1}\mathbf{1}^T - \mathbf{A}), \quad j \in [e],$$

and  $\mathbf{B}_{:, :, e+2}$ . Note that  $\mathbf{C}_{i_1, i_2, :}$  encodes the isomorphism type of the 2-tuple sub-graph defined by  $v_{i_1}, v_{i_2} \in V$ , since each entry of  $\mathbf{C}$  holds a concatenation of the node colors times the adjacency matrix of the graph ( $\mathbf{A}$ ) and the adjacency matrix of the complement graph ( $\mathbf{1}\mathbf{1}^T - \mathbf{A}$ ); the last channel also contains an indicator if  $v_{i_1} = v_{i_2}$ . Note that the transformation  $\mathbf{B} \mapsto \mathbf{C}$  can be implemented with a single block  $B_1$ .

**2-FWL update step.** Next we implement a 2-FWL update step, Equation 4, which for  $k = 2$  takes the form  $\mathbf{C}_i = \text{enc}\left(\mathbf{B}_i, \left\{(\mathbf{B}_{j, i_2}, \mathbf{B}_{i_1, j}) \mid j \in [n]\right\}\right)$ ,  $i = (i_1, i_2)$ , and the input tensor  $\mathbf{B} \in \mathbb{R}^{n^2 \times a}$ . To implement this we will need to compute a tensor  $\mathbf{Y}$ , where the coloring  $\mathbf{Y}_i$  encodes the multiset  $\left\{(\mathbf{B}_{j, i_2, :}, \mathbf{B}_{i_1, j, :}) \mid j \in [n]\right\}$ .

As done before, we use the multiset representation described in section 4. Consider the matrix  $\mathbf{X} \in \mathbb{R}^{n \times 2a}$  defined by

$$\mathbf{X}_{j, :} = (\mathbf{B}_{j, i_2, :}, \mathbf{B}_{i_1, j, :}), \quad j \in [n]. \quad (3)$$

Our goal is to compute an output tensor  $\mathbf{W} \in \mathbb{R}^{n^2 \times b}$ , where  $\mathbf{W}_{i_1, i_2, :} = u(\mathbf{X})$ .

Consider the multi-index set  $\{\alpha \mid \alpha \in [n]^{2a}, |\alpha| \leq n\}$  of cardinality  $b = \binom{n+2a-1}{2a-1}$ , and write it in the form  $\{(\beta_l, \gamma_l) \mid \beta, \gamma \in [n]^a, |\beta_l| + |\gamma_l| \leq n, l \in b\}$ . Now define polynomial maps  $\tau_1, \tau_2 : \mathbb{R}^a \rightarrow \mathbb{R}^b$  by  $\tau_1(x) = (x^{\beta_l} \mid l \in [b])$ , and  $\tau_2(x) = (x^{\gamma_l} \mid l \in [b])$ . We apply  $\tau_1$  to the features of  $\mathbf{B}$ , namely  $\mathbf{Y}_{i_1, i_2, l} := \tau_1(\mathbf{B})_{i_1, i_2, l} = (\mathbf{B}_{i_1, i_2, :})^{\beta_l}$ ; similarly,  $\mathbf{Z}_{i_1, i_2, l} := \tau_2(\mathbf{B})_{i_1, i_2, l} = (\mathbf{B}_{i_1, i_2, :})^{\gamma_l}$ . Now,

$$\begin{aligned} \mathbf{W}_{i_1, i_2, l} &:= (\mathbf{Z}_{:, :, l} \cdot \mathbf{Y}_{:, :, l})_{i_1, i_2} = \sum_{j=1}^n \mathbf{Z}_{i_1, j, l} \mathbf{Y}_{j, i_2, l} = \sum_{j=1}^n \tau_1(\mathbf{B})_{j, i_2, l} \tau_2(\mathbf{B})_{i_1, j, l} \\ &= \sum_{j=1}^n \mathbf{B}_{j, i_2, :}^{\beta_l} \mathbf{B}_{i_1, j, :}^{\gamma_l} = \sum_{j=1}^n (\mathbf{B}_{j, i_2, :}, \mathbf{B}_{i_1, j, :})^{(\beta_l, \gamma_l)}, \end{aligned}$$

hence  $\mathbf{W}_{i_1, i_2, :} = u(\mathbf{X})$ , where  $\mathbf{X}$  is defined in Equation 3.

To implement this in the network we need to replace  $\tau_i$  with MLPs  $m_i$ ,  $i = 1, 2$ . That is,

$$\mathbf{W}_{i_1, i_2, l} := \sum_{j=1}^n m_1(\mathbf{B})_{j, i_2, l} m_2(\mathbf{B})_{i_1, j, l} = v(\mathbf{X}), \quad (4)$$

where  $\mathbf{X} \in \mathbb{R}^{n \times 2a}$  is defined in Equation 3.

As before, since input tensors belong to a finite set  $\Omega \subset \mathbb{R}^{n^2 \times (e+1)}$ , so are all possible multisets  $\mathbf{X}$  and all colors,  $\Upsilon$ , produced by any part of the network. Similarly to the proof of Theorem 1 we can take (using the universal approximation theorem) MLPs  $m_1, m_2$  so that  $\max_{x \in \Upsilon, i=1,2} \|\tau_i(x) - m_i(x)\| < \epsilon$ . We choose  $\epsilon$  to be sufficiently small so that the map  $v(\mathbf{X})$  defined in Equation 4 maintains the injective property of  $u$  (see Proposition 1): It discriminates between  $\mathbf{X}, \mathbf{X}'$  not representing the same multiset.

Lastly, note that taking  $m_3$  to be the identity transformation and concatenating  $(\mathbf{B}, m_1(\mathbf{B}) \cdot m_2(\mathbf{B}))$  concludes the implementation of the 2-FWL update step. The computation of the color histogram can be done as in the proof of Theorem 1.  $\square$

## References

- Cybenko, G. (1989). Approximation by superpositions of a sigmoidal function. *Mathematics of control, signals and systems*, 2(4):303–314.
- Hornik, K. (1991). Approximation capabilities of multilayer feedforward networks. *Neural networks*, 4(2):251–257.
